1 **Genotype, nitrogen and herbivory shape plant defense: the case of a vitamin-**  
2 **enriched maize**

3 **Agnès Ardanuy<sup>1</sup>, Victoria Pastor<sup>2</sup>, Gaëtan Glauser<sup>3</sup>, Paul Christou<sup>1,4</sup>, Ted C. J. Turlings<sup>5</sup>,**

4 **Ramon Albajes<sup>1</sup>**

5

6 <sup>1</sup>Departament de Producció i Protecció Vegetal, Agrotecnio Center, Universitat de Lleida,

7 Rovira Roure 191, E-25198 Lleida, Spain. email: agnes.ardanuy@gmail.com

8 <sup>2</sup>Metabolic Integration and Cell Signaling Group, Plant Physiology Section, Department of

9 CAMN, Universitat Jaume I, Castelló, Spain. email: pastorm@uji.es

10 <sup>3</sup>Neuchâtel Platform of Analytical Chemistry, University of Neuchâtel, Rue Emile-Argand 11,

11 2000 Neuchâtel, Switzerland. email: gaetan.glauser@unine.ch

12 <sup>4</sup>ICREA, Catalan Institute for Research and Advanced Studies, Passeig Lluís Companys 23,

13 08010 Barcelona, Spain. email: christou@pvcf.udl.cat

14 <sup>5</sup>Laboratory for Fundamental and Applied Research in Chemical Ecology (FARCE), University

15 of Neuchâtel, Rue Emile-Argand 11, 2000 Neuchâtel, Switzerland. email:

16 ted.turlings@unine.ch

17

18 **HIGHLIGHT**

19 We show the separate and interactive effects of nitrogen availability and genotype on the  
20 performance and behavior of a herbivore, and related these changes to constitutive and inducible  
21 maize defenses.

22

23 **ABSTRACT**

24 The cultivation of crops with novel traits could interfere with ecosystem services delivered by  
25 arthropods through bottom-up effects. Here we tested the hypothesis that a vitamin enriched  
26 maize (Carolight<sup>R</sup>) is similar in terms of plant-arthropod interactions to its wild type when  
27 compared in controlled environment and under field conditions. In order to assess the  
28 robustness of their equivalence we tested two nitrogen availability regimes. We used arthropod  
29 field abundance, the behavior and fitness of a keystone maize herbivore - the leafhopper  
30 *Zyginidia scutellaris* - and above ground chemistry of maize plants (volatile, hormone and  
31 metabolite profiling) as indicators of potential changes in plant-insect interactions. Nitrogen  
32 availability was the key driver of herbivore abundance and behavior, and determined direct and  
33 indirect chemical defense in maize plants. Both genotypes presented similar constitutive and  
34 inducible phytohormone profiles independently of the nitrogen regime. However, feeding by the  
35 herbivore suppressed the levels of JA-Ile and JA, without impairing the release of induced plant  
36 volatiles. Carolight<sup>R</sup> and M37W differed to some degree in the concentrations of phenolics  
37 (hydroxycinnamic acids and lignans) and in the abundance of a volatile compound. Overall the  
38 effect of maize genotype on the herbivores was smaller than the effect of nitrogen fertilization.

39 **Key words:** hormone suppression, maize, metabolomics, modified metabolism, nitrogen  
40 fertilization, plant defense, plant-insect interactions, *Zyginidia scutellaris*.

41

42

43 **INTRODUCTION**

44 One of the issues regarding the cultivation of novel crops (genetically modified or  
45 otherwise) is their possible effect on insect biodiversity and associated ecosystem  
46 services in agriculture. The mandatory environmental risk assessment for cultivation of  
47 novel crops addresses the hypothesis that the traits introduced into the novel crops do  
48 not adversely affect the non-target arthropods. Risk assessments are comparative in the  
49 sense that novel crops are screened for phenotypic and compositional equivalence to  
50 their wild type counterpart, and the biologically meaningful differences observed  
51 between them are a consequence of the novel trait (Wolt *et al.*, 2010) and are  
52 subsequently evaluated. In addition to risk assessment purposes, studying the herbivore  
53 community responses to novel varieties, and in turn the biochemical responses of those  
54 novel plant varieties to insect herbivory and nutrient availability may help improve our  
55 understanding of plant chemical profiles and their role in plant–herbivore interactions.

56 An elite South African maize inbred was engineered to deliver pro-vitamin A (and other  
57 nutritionally important carotenoids such as lutein, zeaxanthin and lycopene) in the diet  
58 and thus address vitamin A and other nutritional deficiencies in at-risk populations in  
59 developing countries. The kernels of this novel maize (Carolight<sup>R</sup>) accumulate higher  
60 levels of 3 vitamins in the endosperm through the simultaneous engineering of 3  
61 separate metabolic pathways: 169-fold the normal amount of beta-carotene (provitamin  
62 A), 6-fold the normal amount of ascorbate (vitamin C), and double the normal amount  
63 of folate (vitamin B9) (Naqvi *et al.*, 2009). Molecular and biochemical characterization  
64 of Carolight<sup>R</sup> seeds (transcript, proteome, and metabolite profiles) indicated changes in  
65 sugar and lipid metabolism in the endosperm with respect to the wild type due to the  
66 higher up-stream metabolite demand by the extended biosynthesis capacities for  
67 terpenoids and fatty acids (Decourcelle *et al.*, 2015). Nevertheless under field conditions  
68 the metabolic phenotype of vitamin-enriched maize kernels under contrasting soil  
69 nitrogen conditions was indistinguishable from the wild type in terms of carotenoid  
70 accumulation in leaves, photosynthetic activity, sensitivity to source limitation and yield  
71 (Zanga *et al.*, 2016). Authors concluded that the additional metabolic requirements of  
72 Carolight<sup>R</sup> endosperm did not affect agronomic performance. Interestingly gravid  
73 females of the key Mediterranean maize pest *Sesamia nonagrioides* preferred the  
74 volatiles of the wild type to Carolight<sup>R</sup> in an olfactometer setting (Cruz and Eizaguirre,

75 2015), which led to the notion that vitamin enriched maize might modify the outcome of  
76 plant-insect interactions.

77 The strong influence of plant chemical traits on food webs has been demonstrated  
78 experimentally both above and below ground (e.g. van der Putten et al. 2001, Ode  
79 2006). As it is not possible to measure all ecological interactions between a plant and its  
80 associated insect species, we used the arthropod field abundance, the behaviour and  
81 fitness of an herbivore keystone species (Albajes *et al.*, 2011) and above ground  
82 chemistry of maize plants as indicators of possible modifications in plant–insect  
83 interactions. We therefore tested the hypothesis that Carolight<sup>R</sup> is similar in terms of  
84 plant–arthropod interactions to its wild type line (M37W) when compared in a  
85 controlled environment and in the field. The over-arching objectives of the current study  
86 were to: (i) determine if Carolight<sup>R</sup> and M37W influence abundance and dynamics of  
87 herbivores and natural enemies in the field; (ii) determine potential impact of both  
88 genotypes on herbivore choice and performance under controlled conditions; (iii)  
89 characterize the chemical profiles of leaves usually consumed by most herbivores (and  
90 thus involved in plant–insect interactions) in both genotypes. Characterization was  
91 carried out through volatile, hormone and metabolite profiling. In order to broaden the  
92 range of environments in the study and to test the consistency of performance between  
93 Carolight<sup>R</sup> and M37W, we compared both genotypes under different substrate nitrogen  
94 availability regimes. The data and conclusions from our studies not only validate the use  
95 of plant-insect interactions in the environmental risk assessment of crops with novel  
96 traits, but importantly also shed light into the biochemical and metabolic components  
97 that underpin the mechanisms involved in maize-insect interactions.

## 98 **MATERIAL AND METHODS**

### 99 *Plants and nitrogen treatments*

100 Seeds of the elite South African maize (*Zea mays* L.) inbred cv. M37W and its vitamin  
101 enriched derived line Carolight<sup>R</sup> were obtained from the Applied Plant Biotechnology  
102 Group at Universitat de Lleida- Agrotecnio Center.

103 A field experiment was carried out in order to evaluate the performance of Carolight<sup>R</sup>  
104 and M37W in terms of arthropod community composition and dynamics. The

105 experimental design encompassed a factorial combination of the two maize genotypes  
106 and two nitrogen treatments. Plots were randomized with four replicates per genotype-  
107 nitrogen combination, each consisting of 6 rows, 70 cm apart and 6.47 m in length  
108 (approximately 4 plants per meter). Maize was planted on 5 May 2013. Two different  
109 fertilization regimes were applied on 9 July 2013: Control = 0 kg ha<sup>-1</sup> and +N = 200 kg  
110 ha<sup>-1</sup> as urea at the V6 stage (six fully expanded leaves). Each plot was fully irrigated.

111 For laboratory experiments, seeds from each line were sown in plastic pots (10 cm high,  
112 5 cm diameter) in vermiculite, and germinated in the greenhouse. Forty maize plants  
113 (seven to ten days old) were placed in plastic containers and provided 2.5 l of  
114 hydroponic solution for 10-12 days. Two hydroponic solutions were tested: a control  
115 solution and a solution with an increased content in nitrogen (+N). The control solution  
116 consisted of a half-strength modified Hoagland solution with micro-nutrients provided  
117 at full strength. The solution with nitrogen (+N) consisted of a control solution in which  
118 8 mM of NH<sub>4</sub>NO<sub>3</sub> was added. The hydroponic solutions were adjusted to pH 5.9, and  
119 were buffered with MES tampon. The solution was replaced every 3-4 days.

#### 120 *Insects and herbivory treatments*

121 A colony of the leafhopper *Z. scutellaris* was established from small grain cereal and  
122 maize fields at the Universitat de Lleida (Spain). The colony was reared under  
123 controlled conditions (16:8 h L:D, 24±5 °C) on maize plants (var. Delprim).

124 Plants were transferred to an experimental chamber equipped with full spectrum light  
125 benches (24±2 °C, 40±10% r.h., 16:8 h L/ D, and 8000 lm m<sup>-2</sup>) the day prior the  
126 experiments started. Plants used for volatile collection were enclosed in custom made  
127 Nalophan bags (Omya AG, Oftringen, Switzerland, 150 mm diameter) closed with a  
128 parafilm seal at the top of the plastic pot. Plants used for hormone and non-targeted  
129 metabolome profiling were enclosed in bottom cut PET plastic bottles covered with  
130 muslin cloth. Herbivore treatment was initiated on the following day by exposing plants  
131 to ten *Z. scutellaris* adults for 24 h in the case of volatile analysis and non-targeted  
132 metabolome profiling, and 24, 48 and 96h for hormone profiling. The timing was  
133 chosen based on a previous study which indicated a strong induction of plant volatiles at  
134 24h after the start of leafhopper feeding (Ardanuy *et al.*, 2016).

135 *Field herbivore and natural enemy abundance*

136 Visual sampling of arthropod fauna was conducted on whole plants from the 9th of July  
137 (V6-7 stage) to the 16th of September, 2013 every other week (5 samplings in total)  
138 according to Albajes et al. (2011). We sampled four plants from each plot randomly,  
139 and we recorded the number of herbivores and their natural enemies per plant.  
140 Herbivore counts were grouped in five taxonomic units: Thysanoptera (thrips),  
141 Hemiptera\Aphididae (aphids), Hemiptera\Cicadellidae (leafhoppers, mainly *Zyginidia*  
142 *scutellaris*), and Hemiptera\ Delphacidae (planthoppers, *Laodelphax striatellus*) and  
143 Lepidoptera (*Spodoptera spp.*, *Helicoverpa armigera*, corn borers). Later we  
144 transformed aphid counts into an abundance scale (0, no aphids; 1, isolated aphids; 2,  
145 small colony; 3, medium colony; 4, large colony). Natural enemy counts were grouped  
146 in Hemiptera\Anthocoridae, Hemiptera\Miridae, Neuroptera, Coccinellidae,  
147 Thysanoptera (thrips) and Arachnida.

148 We calculated the sum of abundances per plot and sampling date for all taxonomic  
149 units. We tested the effects of genotype, nitrogen, and sampling date on herbivore and  
150 natural enemy community with a permutational MANOVA using the Adonis function in  
151 the package *vegan* in R (Oksanen *et al.*, 2013). We then performed univariate analysis  
152 at the species level for herbivore abundance data with a generalized linear model  
153 following a Negative Binomial distribution in which sampling date, nitrogen treatment  
154 and genotype and their interactions were used as fixed factors. Aphid abundance was  
155 analyzed with an ordinal logistic regression. All statistical analyses were performed  
156 using R (R Development Core Team) unless otherwise indicated.

157 *Herbivore performance and plant choice*

158 Leafhopper performance was tested by transferring 1-day old leafhopper nymphs from  
159 the colony to maize plants and letting them develop until adult stage. Plant treatments  
160 consisted of a factorial combination of the two maize genotypes and two N treatments  
161 (control and +N) (n=13-15 plants per treatment). Plants were enclosed in plastic bottles  
162 with their bottom open, covered by cloth to prevent leafhoppers from escaping; each  
163 plant contained 3 leafhoppers. Plants were monitored daily until leafhoppers reached  
164 adult stage. Leafhoppers were then removed and placed in 0.5 mm eppendorfs and  
165 frozen at -20°C until sexed and weighed. When there was more than one leafhopper per  
166 sex in a plant we averaged final weight and developmental time. Final weight of

167 leafhopper individuals and developmental time was analyzed with a GLM following a  
168 Gaussian distribution using the variables insect sex, nitrogen regime and genotype and  
169 their interactions as factors.

170 The effects of plant volatiles emitted by the different combination of varieties and  
171 nitrogen treatments on the behavior of the leafhopper were investigated in a six-arm-  
172 olfactometer (for details see Turlings, Davison, & Tamò, 2004). A plant from each  
173 genotype-nitrogen treatment was placed in glass vessels one hour before the assay  
174 began. Two empty vessels were used as blanks. Purified and humidified air entered each  
175 odor source bottle at 0.8 l/min via Teflon tubing (adjusted by a manifold with four flow-  
176 meters; Analytical Research System, Gainesville, FL, USA) and carried the volatiles  
177 through to the olfactometer compartment. The position of the odor sources in the  
178 olfactometer was randomly assigned each experimental day to avoid position-bias.

179 At least half an hour before the experiment started groups of six *Z. scutellaris* females  
180 were isolated in pipette tips by means of a manual aspirator, and covered in parafilm.  
181 Twelve leafhoppers were freed at the base of the olfactometer and left for 45 minutes.  
182 Only when an insect entered an arm and passed the screw cap fitting or was recovered  
183 in the bulb we considered it had made a choice. Three times twelve females were tested  
184 per experiment per day. All olfactometer tests were conducted between 10 am and 4 pm  
185 under light benches ( $24\pm 2$  °C). Each experiment was performed 7 times on different  
186 days. This resulted in 7 independent replicates for each olfactometer setup.

187 Olfactometer choice counts were analyzed with a GLM following a Poisson  
188 distribution, with nitrogen regime and genotype and their interactions as factors. Pair-  
189 wise comparisons were performed with using Tukey's HSD.

#### 190 *Analysis of volatile profiles*

191 VOCs were collected simultaneously from herbivore-damaged plants and from control  
192 non-damaged plants for all the treatments consisting of the factorial combination of  
193 genotype and nitrogen treatments. Two tubular glass outlets (23x17x12 mm) with a  
194 screw cap were attached to the bottom and top of the bag respectively (as described by  
195 Turlings et al. 1998). Clean air was supplied to the system through the top outlet via  
196 Tygon tubing connected to a flowmeter (Analytical Research Systems) and through the  
197 bottom device air was pulled through a volatile adsorbent trap at a rate of 1 l/min using

198 a vacuum pump. We collected volatiles of each odor source for 5h using adsorbent traps  
199 consisting of a glass tube (4 mm ID) packed with 25 mg Super-Q polymer (80–100  
200 mesh) (Alltech Associates, Deerfield, Illinois, USA). We performed seven experimental  
201 replicates for all treatments on different days.

202 The traps were then extracted with 150  $\mu$ l dichloromethane (Suprasolv, Merck,  
203 Dietikon, Switzerland), and 200 ng of n-octane and n-nonyl acetate (Sigma, Buchs,  
204 Switzerland) in 10  $\mu$ l dichloromethane were added to the samples as internal standards.  
205 Samples were analyzed with a GC-MS as described in Ardanuy et al., (2016). The  
206 detected volatiles were identified by comparison of their mass spectra with those of the  
207 NIST 05 library and by comparison of retention times with those from a library from  
208 earlier assays.

209 Permutational MANOVA was used to evaluate whether the VOC blend varied between  
210 herbivore treatments, nitrogen availability regimes and among genotypes. The  
211 abundance of the components of the volatile blend was used as the response variable,  
212 while herbivore treatment, nitrogen regime, plant genotype, and their double  
213 interactions were used as independent variables. In addition the amount of each  
214 individual compound was compared among treatments using a non-parametric Kruskal-  
215 Wallis test followed by Dunn's test.

216

#### 217 *Plant hormones and hydroxycinnamic acid analysis*

218 A targeted analysis of plant hormones and phenolic compounds of herbivore-damaged  
219 plants (n=3) and control plants (n=3) was performed for each combination of genotype-  
220 nitrogen levels at three time points (24, 48 and 96h) after the experiment started. The  
221 aboveground part of the plants was flash frozen with liquid nitrogen and stored at -80°C  
222 until freeze dried. The experiment was repeated three times. The hormones jasmonoyl-  
223 L-isoleucine (JA-Ile), 12-oxo-phytodienoic acid (OPDA), jasmonic acid (JA), salicylic  
224 acid (SA), abscisic acid (ABA) and indole-3-acetic acid (IAA), and the  
225 hydroxycinnamic acids caffeic acid, chlorogenic acid and ferulic acid were analyzed by  
226 ultra-performance liquid chromatography coupled to mass spectrometry (UPLC-MS), as  
227 described by Camañes et al. (2012). Data from the three experiments were log-  
228 transformed and analyzed by a linear model with nitrogen regime and genotype and  
229 their interactions as factors, and experiment as a block. Within an experiment pair-wise  
230 comparisons were performed using the Klustal-Wallis test.



231 *Metabolite fingerprinting*

232 Non-targeted metabolite profiling of herbivore damaged (n=5) and control plants (n=5)  
233 was performed for each combination genotype-nitrogen levels. The aboveground part of  
234 the plants was flash frozen with liquid nitrogen 24h after the experiment started and  
235 stored at -80°C. Each sample was ground to powder using a mortar previously frozen in  
236 liquid nitrogen. The frozen powder was weighed (100 mg  $\pm$ 1mg) in an Eppendorf tube,  
237 and 500  $\mu$ l of extraction solvent (MeOH:H<sub>2</sub>O:formic acid 80:20:0.5) and a few glass  
238 beads were added. Samples were briefly vortexed and then extracted in a bead mill for  
239 three minutes at 30Hz. After centrifugation at 10,000 rpm for 10 min (Hettich  
240 mikrolitter D 7200, Buford, GA, USA) the supernatant was transferred to a new  
241 Eppendorf tube, to which 350  $\mu$ l of dichloromethane was added. Samples were vortexed  
242 and centrifuged again to separate the two phases. The upper phase was recovered (150  
243  $\mu$ l) and transferred to HPLC vials.

244 Metabolite analysis was performed using an Acquity UPLC™ system (Waters) coupled  
245 to Synapt G2 QTOF mass spectrometer (Waters) through an electrospray interface  
246 (ESI). The separation was performed on an Acquity BEH C18 column (50  $\times$  2.1 mm  
247 i.d., 1.7  $\mu$ m particle size) at a flow rate of 0.6 mL min<sup>-1</sup>. The injection volume was 3  $\mu$ l  
248 and the autosampler and column temperatures were kept at 15 and 40 °C, respectively.  
249 The mobile phase consisted of 0.05% formic acid (FA) in water (phase A) and 0.05%  
250 FA in acetonitrile (phase B). The segmented gradient program was as follows: 2% B to  
251 35% B in 3.0 min, 35% B to 100% B in 3.0 min, held at 100% B for 1.5 min, re-  
252 equilibrated to initial conditions (2% B) for 1.5 min. Data acquisitions was performed in  
253 ESI-negative and ESI-positive modes over a mass range of 100–1000 Da. The MS<sub>e</sub>  
254 mode, in which the instrument alternatively acquires data at low (4 eV; 0.15 s scan  
255 time) and high (10-30 eV ramp; 0.15 s scan time) collision energies, was used. The  
256 mass spectrometer was internally calibrated by infusing a 500 ng/mL solution of  
257 leucine-enkephalin at a flow rate of 15  $\mu$ l/min through the LockSpray™ probe. The  
258 system was controlled by Masslynx v4.1.

259 Metabolite raw data was transformed to CDF using Databridge provided by the  
260 Masslynx package. The CDF data was processed with R for statistical computing using  
261 XCMS package for relative quantification (Smith *et al.*, 2006). ESI-negative and ESI-  
262 positive data were combined, log-transformed and Pareto scaled prior to analysis. Pareto  
263 scaling gives each variable a variance equal to the square root of its standard deviation.

264 The advantage of using this technique rather than scaling to unit variance is that the  
265 former reduces the relative importance of large values but keeps data structure partially  
266 intact (van den Berg *et al.*, 2006). First a permutational MANOVA was used to evaluate  
267 whether the metabolite fingerprint consistently varied among genotypes, nitrogen  
268 availability regimes and herbivore treatments and the influences of the interactions of  
269 the factors (permutations=999). Next, a principal component analysis (PCA) was  
270 conducted as an unsupervised method to visualize variability and clustering in the data  
271 set.

272 Partial least squares–discriminant analyses (PLS–DA) were performed to identify  
273 differently detected ions between plant experimental factors - wild type vs. Carolight<sup>R</sup>,  
274 control nitrogen vs. nitrogen treatment, and controls vs. leafhopper-induced plants -  
275 given that interactions between factors were non-significant in the perMANOVA. PLS–  
276 DA is a supervised multivariate analysis technique, which maximizes the covariance  
277 between the X–(spectral intensities) and the Y–matrix (group information). We assessed  
278 model reliability using CV-ANOVA. New components were only added to the model  
279 when significant according to the cross–validation.  $R^2X$  and  $R^2Y$  represent the fraction  
280 of the variance of X and Y matrix, respectively, while  $Q^2Y$  suggests the predictive  
281 accuracy of the model. Variable influence on projection (VIP) was used to select the  
282 most influential metabolites to group separation in the validated PLS-DA models. The  
283 VIP values summarize the overall contribution of each X-variable to the model,  
284 summed over all components and weighted according to the Y variation accounted for  
285 by each component. The Sum of squares of all VIP's is equal to the number of terms in  
286 the model - the average VIP is equal to 1- and thus terms with large VIP are the most  
287 important for explaining Y. We considered that metabolites with a  $VIP > 2$  were  
288 extremely influential for treatment separation. The ions with  $VIP > 2$  for each  
289 experimental factor (genotype, nitrogen and herbivory) were screened for putative  
290 identification using the pathway tool from MarVis (Kaeffer *et al.*, 2014). The MS/MS  
291 fragmentation of the metabolites was compared with candidate compounds identified in  
292 databases or earlier publications, especially when the metabolites were already reported  
293 in maize. Metabolite multivariate analysis (PCA, PLS-DA) was performed with  
294 SIMCA–P software (v. 11.0, Umetrics, Umeå, Sweden).

295

## 296 **RESULTS**

297 *Effects of genotype and nitrogen on arthropod communities in the field*

298 The most prominent source of variation in insect abundances in the field was plant  
299 developmental stage, which reflects seasonal insect dynamics in the plot (Table 1).  
300 Thus, abundance of maize herbivores was mainly influenced by the developmental stage  
301 of the plant (perMANOVA  $R^2 = 0.62$ ,  $p < 0.001$ ) and to a minor extent by nitrogen  
302 regime ( $R^2 = 0.13$ ,  $p = 0.085$ ) while no effects were attributable to genotype ( $R^2 = 0.07$ ,  
303  $p = 0.213$ ) or genotype x nitrogen interaction ( $R^2 = 0.02$ ,  $p = 0.684$ ). Similarly, maize  
304 developmental stage was the main factor explaining the variation in the abundance of  
305 the natural enemies recorded in the study ( $R^2 = 0.28$ ,  $p < 0.001$ ) whilst genotype and  
306 nitrogen were not significant for determining community composition.

307 Leafhoppers and thrips were the most abundant herbivore taxa in the field, and  
308 Anthocoridae and spiders the most abundant natural enemy taxa (Supplementary  
309 material, Fig. S.2, S.3, S.4). Univariate analysis revealed that Hemipteran herbivores  
310 (leafhoppers, planthoppers and aphids) were more abundant in the higher nitrogen  
311 treatments independently of population dynamics (Table 1). Only leafhopper  
312 populations were influenced by plant genotype: Carolight<sup>R</sup> plots supported lower  
313 populations of leafhopper nymphs than the wild type (Table 1). Levels of other  
314 herbivores such as thrips and Lepidoptera were not influenced by nitrogen treatment or  
315 genotype (Table 1). Overall the variation of natural enemy taxa was attributable to  
316 population dynamics, and no differences were detected between any of the treatments  
317 (Table 1).

318 *Effects of plant variety and nitrogen levels on herbivore choice and performance*

319 Plants from both genotypes in the high nitrogen hydroponic treatments (+N) were taller  
320 and shoots were more robust than plants grown under control nitrogen conditions  
321 (Supplementary material Fig. S.1). Genotype and nitrogen factors did not impact  
322 herbivore performance as sex was the only significant predictor of final weight  
323 ( $F_{1,62} = 121.40$ ,  $p < 0.001$ ) and developmental time ( $F_{1,62} = 8.71$ ,  $p = 0.032$ ). Overall, plants  
324 from both genotypes grown under high nitrogen attracted more female leafhoppers than  
325 plants grown with no additional nitrogen ( $\chi^2_1 = 25.22$ ,  $p < 0.001$ ); however, when  
326 considering only the high nitrogen treatment Carolight<sup>R</sup> was preferred ( $\chi^2_1 = 4.19$ ,  
327  $p = 0.04$ ) (Fig. 2). Leafhoppers chose maize plants over empty bottle control treatments  
328 ( $\chi^2_5 = 30.70$ ,  $p < 0.001$ ) a result that validates the experimental setup.

329

330 *Effects of plant variety, nitrogen levels and herbivory on volatile compounds*

331 Seven volatile compounds were quantified in our study (Table 2) and all seven had been  
332 previously reported in maize (Degen *et al.*, 2004). We expected a small number and  
333 amount of volatile compounds in control and herbivore induced plants given that (i) the  
334 wild type line M37W produces low amounts of volatile inducible terpenes (Richter *et al.*,  
335 2016) and that (ii) *Z. scutellaris* induced plants do not emit the green leaf volatiles  
336 (*Z*)-3-hexenal and (*E*)-2-hexenal (Ardanuy *et al.*, 2016). Herbivory explained the most  
337 variability in volatile blends (perMANOVA  $R^2=0.647$ ,  $p=0.001$ ), and a clear separation  
338 between control and herbivore induced plants was observed in PC1 (Supplementary  
339 material, Fig. S.5). Herbivore damaged plants emitted DMNT, indole, *E*- $\beta$ -farnesene  
340 and (*E*)- $\beta$ -bergamotene in addition to  $\alpha$ -copaene, *E*- $\beta$ -caryophyllene and  $\beta$ -  
341 sesquiphellandrene. However, a significant genotype per nitrogen interaction was  
342 detected (perMANOVA  $R^2=0.036$ ,  $p=0.007$ ). In particular, individual differences in  
343 volatile emission between nitrogen regimes could be attributed for  $\alpha$ -copaene and *E*- $\beta$ -  
344 caryophyllene (Table 2), while differences between genotypes were only detected for  $\beta$ -  
345 sesquiphellandrene in the high nitrogen treatment consistent with the preference of *Z.*  
346 *scutellaris* females for Carolight<sup>R</sup> +N in the olfactometer assay. An effect of the  
347 experimental day of volatile collection was detected on the volatile blend ( $R^2=0.028$ ,  
348  $p=0.011$ ).

349 *Effects of plant variety, nitrogen availability and herbivory on phytohormone and*  
350 *hydroxycinnamic acid accumulation*

351 To further investigate the effect of genotype, nitrogen and herbivore attack on plant  
352 defenses, the concentrations of the phytohormones JA, OPDA, JA-Ile, SA, ABA and  
353 IAA were measured together with the hydroxycinnamic acids caffeic, ferulic and  
354 chlorogenic acid. The concentration of JA-Ile, JA, and SA, was significantly influenced  
355 by herbivory and time point (Fig. 3, models in Supplementary material Table S.1).  
356 Interestingly, feeding by the herbivore *Z. scutellaris* significantly repressed JA-Ile and  
357 JA, as mean levels of JA-Ile and JA in herbivore-damaged plants was lower than in  
358 their respective undamaged controls (Fig 3). This trend was also significant but not as  
359 clear for SA and ABA accumulation after herbivory by maize leafhoppers (Fig. 3,  
360 models in Supplementary material Table S.1). Hormone concentrations were similar

361 among genotype per nitrogen treatments at all time points with the exception of (i) SA  
362 levels that were lower in Carolight<sup>R</sup> relatively to M37W (Fig 3) and (ii) OPDA  
363 accumulated in higher concentrations in plants when grown under high nitrogen (Fig 3).  
364 Overall, caffeic and chlorogenic acid concentrations were up to 2-fold lower in  
365 Carolight<sup>R</sup> than in the wild type (Fig 4). Caffeic acid concentration also depended on  
366 herbivory, time point and time point per nitrogen interaction (Fig. 4 Supplementary  
367 material Table S.1), whereas chlorogenic acid accumulation varied greatly between  
368 nitrogen regimes with its concentration practically doubling under control versus high  
369 nitrogen treatments (Fig 4). No consistent differences were detected for ferulic acid  
370 accumulation for any of the factors (Supplementary material, Table S.1).

371 *Effects of plant variety, nitrogen availability and herbivory on the metabolite*  
372 *fingerprint*

373 In total 4271 and 2002 markers were detected in ESI (+) and ESI (-) mode, respectively.  
374 Overall, nitrogen availability was the main factor contributing to the observed  
375 chemotypes (perMANOVA,  $R^2=0.124$ ,  $p=0.001$ ), followed by genotype ( $R^2=0.038$ ,  
376  $p=0.030$ ) and herbivory ( $R^2=0.034$ ,  $p=0.048$ ) while interactions of the experimental  
377 factors were non-significant. An unsupervised approach (PCA) showed that nitrogen  
378 metabolites from plants subjected to control and high nitrogen treatments clearly  
379 grouped in the first two PCs (Fig. 5), independently of the plant genotype and herbivore  
380 treatment. In contrast, genotype and herbivory related profiles could not be separated by  
381 PCA. However, a supervised partial least squares discriminant analysis (PLS-DA)  
382 model separated (i) nitrogen regimes (ii) maize genotypes, and (iii) healthy and  
383 herbivore damaged plants (Table 3, validated through CV-ANOVA). These PLS-DA  
384 models were used to identify the metabolites showing the maximum difference between  
385 treatments with VIP values  $>2$  (Table 3), and subsequently the selected metabolites for  
386 each experimental factor (variety, nitrogen and herbivory) were screened for putative  
387 identification using the pathway tool from MarVis 2.0 software (Kaeffer et al 2014)  
388 (Table 3, Table 4). Mean intensities of the markers plant genotype, nitrogen and  
389 herbivory by *Z. scutellaris* are represented in Supplementary material (Fig. S6, S.7 and  
390 S.8).

391

392

393 **DISCUSSION**

394 We addressed the hypothesis that a nutritionally enhanced maize (Carolight<sup>R</sup>), similar in  
395 terms of biomass and yield to its wild type line M37W (Zanga *et al.*, 2016), will also be  
396 equivalent in terms of plant-insect interactions. Evaluating Carolight<sup>R</sup> and wild type  
397 genotypes under contrasting nitrogen levels allowed for (i) a broader characterization of  
398 the resulting chemotypes and their impact on insect behavior/performance; and (ii) a  
399 comparative analysis of the impact of experimental factors (nitrogen, genotype,  
400 herbivory) on the final chemotypes. We demonstrated that nitrogen availability is the  
401 main factor determining herbivore preference and the metabolite fingerprint in  
402 Carolight<sup>R</sup> and M37W, followed by the introduced traits and herbivory. There were no  
403 significant effects of nitrogen x genotype or herbivory x genotype interactions,  
404 suggesting that both genotypes behaved similarly when grown under the same nitrogen  
405 conditions.

406 *Insect abundance and performance on Carolight<sup>R</sup> in contrasting nitrogen availability*  
407 *conditions*

408 Overall, the community of herbivores was similar for both Carolight<sup>R</sup> and M37W  
409 genotypes. Yet in the case of Hemiptera (leafhoppers, planthoppers and aphids) higher  
410 abundances were detected in plots with high nitrogen while only the leafhopper *Z.*  
411 *scutellaris* nymph abundances were significantly higher for M37W. Nitrogen is one of  
412 the most frequently used fertilizers in agricultural production and is known to exert a  
413 variety of bottom-up effects and potentially alter tritrophic interactions through various  
414 mechanisms (Chen *et al.*, 2010), especially for herbivorous Hemiptera (Butler *et al.*,  
415 2012). Hemipterans are insects with a high potential sensitivity to plant quality as they  
416 have been reported to prefer and perform better on some genotypes or on plants that  
417 differ in quality in terms of nutritional requirements (e.g. nitrogen content), physical or  
418 chemical plant defense (e.g. Kallenbach *et al.*, 2011; Zytynska and Preziosi, 2011). A  
419 number of reports suggest that herbivore Hemiptera (especially leafhoppers and aphids)  
420 are more abundant and/or perform better on Bt maize lines compared to their  
421 corresponding near isogenic counterparts (Lumbierres *et al.*, 2004, 2010; Pons *et al.*,  
422 2005; Obrist *et al.*, 2006; Virla *et al.*, 2010; Rauschen *et al.*, 2011). The underlying  
423 mechanism(s) responsible for such differences have not been attributed to specific  
424 factors, rather to pleiotropic effects. Pleiotropic effects reported for Bt maize that might

425 influence Hemipteran densities are higher lignin content in the stem of Bt plants  
426 (Saxena and Totzky, 2001), reduced amount of VOC emission in a Bt line (Turlings *et*  
427 *al.*, 2005) and sap amino acid content (Faria *et al.*, 2007).

428 Insect herbivores are limited by low nitrogen concentrations in food plants, and  
429 therefore herbivore performance is generally thought to be positively related to  
430 increases in nitrogen content in plants (Awmack and Leather, 2002; Behmer, 2009;  
431 Butler *et al.*, 2012). The performance of *Z. scutellaris* nymphs was similar when fed on  
432 Carolight<sup>R</sup> and M37W grown under control and high nitrogen levels. This result was  
433 unexpected as we hypothesized that nitrogen availability would be the main factor  
434 contributing to adult final weight as a proxy for reproductive fitness. However, female  
435 leafhoppers preferred maize plants grown under high nitrogen in the olfactometer test,  
436 and even preferred Carolight<sup>R</sup> over M37W when plants were grown under high  
437 nitrogen. This fact - together with field data on leafhopper abundance - supports the  
438 notion that host plant quality (resulting from enhanced nitrogen fertilization) might  
439 indeed offer other advantages to the species, such as reproductive success, that are not  
440 reflected by adult body weight or duration of nymphal development. Prestidge (1982)  
441 reported an increasing oviposition of *Z. scutellaris* as the nitrogen fertilization increased  
442 in the grass *Holcus lanatus*. Therefore the lack of differences in adult weight and  
443 developmental time for maize leafhoppers in our experiments could be a product of a  
444 mismatch between adult size and fecundity in *Z. scutellaris* as it has been previously  
445 described for grasshoppers (Joern and Behmer, 1998). Several features including field  
446 abundance, plant preference and fecundity could provide the best measures of  
447 performance for *Z. scutellaris* in general.

#### 448 *Maize defense responses to a mesophyll-feeding leafhopper*

449 Plant damage together with salivary secretions of phytophagous arthropods are known  
450 to trigger plant inducible defense responses (Alborn *et al.* 1997, Musser *et al.* 2002). In  
451 turn inducible plant defenses can be major determinants of ecological interactions, and  
452 in particular defenses depending on JA and SA pathways appear to play important roles  
453 in determining community composition (Thaler *et al.*, 2001; Thaler, 2002; Kallenbach  
454 *et al.*, 2011). Hence it was vital to determine whether Carolight<sup>R</sup> and its wild type parent  
455 (M37W) behave similarly in terms of constitutive profiles of JA and SA and in  
456 hormonal response when facing herbivory. Cell content feeders, such as the spider mite

457 *Tetranychus urticae* Koch (Acari: Prostigmata) and the thrips *Frankliniella occidentalis*  
458 (Pergande) (Thysanoptera:Thripidae) usually stimulate JA-inducible genes upon attack  
459 (Vos *et al.*, 2005), although there are reports that confirm the activation of both SA- and  
460 JA-inducible genes (Kant *et al.*, 2004; Kawazu *et al.*, 2012). Given that typhlocybine  
461 leafhoppers such as *Z. scutellaris* feed on the mesophyll using a sawing laceration  
462 strategy (Marion-Poll *et al.* 1987, Backus *et al.* 2005) we predicted that feeding by the  
463 leafhopper would activate either the JA and/or SA pathways. Interestingly feeding by  
464 this herbivore appears to decrease the constitutive levels of JA and SA on maize plants,  
465 and this was reflected in that phytohormone levels in leafhopper damaged plants were  
466 similar or even lower than the constitutive levels in healthy control plants, in particular  
467 those of JA-Ile.

468 Suppression of plant defenses is a well-known phenomenon in plant pathogens such as  
469 pathogenic bacteria, rust fungi, oomycetes, viruses, and herbivores such as nematodes  
470 and spider mites (reviewed by Kant *et al.* 2015 and Zhang *et al.* 2017). Spider mite  
471 *Tetranychus evansi* suppresses both JA and SA dependent defenses in tomato enhancing  
472 their performance (Sarmiento *et al.*, 2011; Alba *et al.*, 2015). In the case of insects the  
473 majority of cases of plant defense suppression has been attributed to JA-SA hormonal  
474 crosstalk (Walling, 2000; Zhang *et al.*, 2017) and not to a direct blocking of JA or SA  
475 defenses. However, recently aphids and mites have been reported to deliver effectors  
476 when feeding as a strategy to overcome host-plant defenses and improve their fitness  
477 (Hogenhout and Bos, 2011; Kant *et al.*, 2015; Mugford *et al.*, 2016; Villarroel *et al.*,  
478 2016). In our experimental system, *Z. scutellaris* - by feeding and oviposition -  
479 suppresses JA and does not induce SA in maize plants, and hence hormonal suppression  
480 appears to occur independently of SA-JA cross talk (as was the case for *T. evansi*). Non-  
481 targeted metabolomics fingerprinting allowed the identification of markers of herbivory  
482 by *Z. scutellaris*, which opens a door to further research on the potential effectors  
483 delivered by the leafhopper and the mechanism of defense suppression.

484 Defense manipulation by maize leafhopper impaired phytohormone accumulation in the  
485 plant without disturbing plant indirect defense by means of herbivore induced plant  
486 volatile emission. Previous work showed that maize plants damaged by ten *Z.*  
487 *scutellaris* adults emitted a similar amount of volatiles than plants damaged by the five  
488 2nd instar *Spodoptera littoralis*, and that the predatory anthocorid *Orius majusculus* was  
489 innately attracted towards the volatile blend (Ardanuy *et al.*, 2016). We hypothesize that



490 the suppression of JA defenses ultimately benefits leafhopper reproduction and nymphal  
491 performance, but natural enemies will still protect the plant through top-down control.  
492 However, defense manipulation by maize leafhoppers might also have consequences for  
493 subsequent colonizing herbivores since maize plants with suppressed defenses might  
494 promote the performance of co-occurring herbivores (Stam *et al.*, 2014; Kant *et al.*,  
495 2015).

#### 496 *Nitrogen determines the chemical defense attributes of Carolight and M37W*

497 Evaluating Carolight<sup>R</sup> and wild type genotypes in contrasting nitrogen conditions  
498 allowed for a comparative analysis of the impact of experimental factors (nitrogen,  
499 genotype, herbivory) on the final maize chemotypes. We demonstrated that nitrogen is  
500 the main factor determining the metabolite fingerprint in Carolight<sup>R</sup> and M37W,  
501 followed by the introduced traits and herbivory. Our results corroborate the work of  
502 Coll *et al.* (2010) where transcript analysis in two maize Bt(Cry1Ab trait)/wild type  
503 pairs in the field indicated that differences between lines (genetic background) exerted  
504 the highest impact on gene expression patterns, followed by nitrogen availability, while  
505 the Cry1Ab trait had the lowest impact. Barros *et al.* (2010) compared two GM maize  
506 pairs - Bt (Cry1Ab) and glyphosate tolerant - using transcriptome, proteome, and  
507 metabolome profiling and reported that the environment affected gene expression,  
508 protein distribution, and metabolite content more strongly than the introduced traits. Our  
509 results are therefore consistent with the literature and show that environmental factors  
510 (e.g. field location, sampling time during the season or at different seasons, mineral  
511 nutrition) consistently exert a greater influence on crop lines than the genetic  
512 modification itself (reviewed by Ricoch *et al.* 2011).

513 In general, nitrogen fertilization increases plant growth and reproduction, decreases  
514 concentrations of carbon-based secondary compounds (e.g. phenolics and terpenoids),  
515 and increases nitrogenous compounds (Koricheva *et al.*, 1998; Lou and Baldwin, 2004;  
516 Scheible *et al.*, 2004; Hermans *et al.*, 2006; Kusano *et al.*, 2011). Nitrogen levels  
517 influenced Carolight<sup>R</sup> and M37W phenotypes at the metabolite level substantially,  
518 including compounds involved in direct and indirect plant defenses. Of the potential 405  
519 markers with a VIP>2 only few were putatively identified. Some of these are secondary  
520 metabolites and contribute to the plant's constitutive defense as flavonoids or  
521 hydroxamic acids (benzoxazinoids) (Table 4, Supplementary material Fig. S.6).

522 Targeted analysis of defense metabolites showed that chlorogenic acid greatly varied  
523 with nitrogen treatments - at higher concentrations in plant tissues when nitrogen was  
524 limiting - but also with the plant genotype - M37W had higher levels of both  
525 chlorogenic and caffeic acids. Higher concentration of constitutive phenolics in plants  
526 under low nitrogen is consistent with results in *Nicotiana attenuata* (Lou and Baldwin,  
527 2004) and tomato (Stout *et al.*, 1998). Carolight<sup>R</sup> accumulated up to 2-fold lower  
528 amounts of plant hydroxycinnamic acids (caffeic and chlorogenic acids) depending on  
529 the nitrogen treatment and time-point, and higher amounts of lignans (especially at low  
530 nitrogen) than the wild type. This suggests an effect of the genotype on the  
531 phenylpropanoid biosynthetic pathway. In addition, phenolics in the form of  
532 unidentified flavonoids were more abundant in control nitrogen maize plants (Table 4,  
533 Supplementary material Fig. S.6).

534 Metabolite fingerprinting showed that nitrogen surplus increased the accumulation of  
535 tryptophan in plants, which we identified as a marker of high nitrogen treatment.  
536 Tryptophan serves as precursor of a broad variety of nitrogen-containing aromatic  
537 secondary metabolites, such as hydroxamic acids (Fig. S.6), which play crucial roles in  
538 plant defense against herbivore feeding (Niemeyer, 2009; Balmer *et al.*, 2013). Higher  
539 levels of constitutive phenolics and hydroxamic acids would theoretically increase plant  
540 tolerance towards herbivores, as increased levels of these secondary compounds have  
541 been associated to reduced herbivory (Mithöfer and Boland, 2012; Balmer *et al.*, 2013).  
542 Olfactometer plant choice might indicate a preference towards plants with lower  
543 concentration of phenolics and higher concentration of hydroxamic acids in the plant;  
544 however, it fails to explain higher abundance of maize leafhopper nymphs in wild type  
545 plots in the field.

546 The VOC blend was also modified by nitrogen availability: a higher concentration of  
547 the sesquiterpenes  $\alpha$ -copaene and E- $\beta$ -caryophyllene was detected for Carolight<sup>R</sup> and  
548 M37W plants under higher nitrogen. This might explain leafhopper preference towards  
549 plants grown under higher nitrogen levels. These results contrast with previous findings  
550 (Schmelz *et al.* 2003) which reported higher VOC emission in maize with limited  
551 nitrogen availability, though differences could be explained by maize varieties or by the  
552 source of nitrogen used in each study. While we applied nitrogen as both nitrate and  
553 ammonium, in the later study nitrogen was applied as nitrate. Nitrogen deficient  
554 soybean plants emitted the same range of herbivore-induced VOCs as control plants, but

555 quantitative changes occurred in the release of the main compound  $\beta$ -farnesene and two  
556 other volatiles ((*Z*)-3-hexenyl- $\alpha$ -methylbutyrate and  $\beta$ -bergamotene) (Winter and  
557 Rostás, 2010) and no differences were detected in *Nicotiana attenuata* (Lou and  
558 Baldwin, 2004).

559 Carolight<sup>R</sup> damaged plants grown under high nitrogen emitted a larger amount of  $\beta$ -  
560 sesquiphellandrene; however the change in the volatile blend did not influence the  
561 community of natural enemies in the field. A blend of VOCs that varies in the  
562 composition or quantity of its components may constitute a signal with altered  
563 information content and may potentially modify the host finding behavior of herbivores  
564 and natural enemies, as it is the case for the maize leafhopper *Z. scutellaris*, which  
565 prefers Carolight<sup>R</sup> to the wild type when grown under high nitrogen. It remains unclear  
566 whether leafhoppers respond in a dose-dependent manner to the total blend of VOCs or  
567 if other compounds at doses too small to detect (D'Alessandro et al. 2006) triggered  
568 leafhopper preference in the olfactometer.

569

## 570 *Conclusion*

571 We show the separate and interactive effects of nitrogen availability and genotype on  
572 the arthropod community and on the performance and behavior of a herbivore, and  
573 correlated these changes to constitutive and inducible maize defenses. We conclude  
574 that: (i) nitrogen availability greatly shapes maize metabolism, and the resulting plant  
575 chemotypes, and promotes *Z. scutellaris* preferences through the emission of a more  
576 attractive blend of VOCs; (ii) feeding by *Z. scutellaris* suppresses the accumulation of  
577 JA-Ile, JA and SA, while triggering the emission of herbivore-induced plant volatiles;  
578 and (iii) that the minor differences detected among Carolight<sup>R</sup> and its wild-type  
579 counterpart in the phenylpropanoid pathway do not substantially alter aboveground  
580 plant-arthropod interactions.

581

## 582 **ACKNOWLEDGMENTS**

583 We would like to thank Michael Gaillard and Daniel Maag for help in sample  
584 preparation, Gemma Camañes for advice on nitrogen treatments, Diana LaForgia for  
585 help in arthropod sampling, Joan Safont, Carmen López and Matilde Eizaguirre for

586 providing *Z. scutellaris*, Daniela Zanga for discussions on Carolight<sup>R</sup> agronomic  
587 performance, Victor Flors and the Metabolic Integration and Cell Signaling Group for  
588 discussion on results and data analysis, and all the members of the FARCE and E-Vol  
589 groups in Neuchâtel for their collaboration. A.A. was funded with an FPU scholarship  
590 and a visiting grant to FARCE laboratory from the Ministerio de Educación, Spain. The  
591 work was partially funded by the Spanish Government projects AGL2011-23996 and  
592 AGL2014-53970-C2-1-R, Agrotecnio (Fundació Centre de Recerca en Agrotecnologia,  
593 VitaMaize 01 project) and Fundació la Caixa (Grant P13005).  
594

## REFERENCES

- Alba JM, Schimmel BCJ, Glas JJ, Ataide LMS, Pappas ML, Villarroel CA, Schuurink RC, Sabelis MW, Kant MR. 2015. Spider mites suppress tomato defenses downstream of jasmonate and salicylate independently of hormonal crosstalk. *New Phytologist* 205, 828–840.
- Albajes R, Lumbierres B, Pons X. 2011. Two heteropteran predators in relation to weed management in herbicide-tolerant corn. *Biological Control* 59, 30–36.
- Alborn HT, Turlings TCJ, Jones TH, Stenhagen G, Loughrin JH, Tumlinson JH. 1997. An elicitor of plant volatiles from beet armyworm oral secretion. *Science* 276, 945–949.
- Ardanuy A, Albajes R, Turlings TCJ. 2016. Innate and Learned Prey-Searching Behavior in a Generalist Predator. *Journal of Chemical Ecology* 42, 497–507.
- Awmack CS, Leather SR. 2002. Host plant quality and fecundity in herbivorous insects. *Annual Review of Entomology* 47, 817–844.
- Backus EA, Serrano MS, Ranger CM. 2005. Mechanisms of hopperburn: an overview of insect taxonomy, behavior, and physiology. *Annual Review of Entomology* 50, 125–151.
- Balmer D, Flors V, Glauser G, Mauch-Mani B. 2013. Metabolomics of cereals under biotic stress: current knowledge and techniques. *Frontiers in Plant Science* 4, 82.
- Barros E, Lezar S, Anttonen MJ, Dijk JP Van, Ro RM, Kok EJ, Engel K. 2010. Comparison of two GM maize varieties with a near- isogenic non-GM variety using transcriptomics , proteomics and metabolomics. *Plant Biotechnology Journal* 8, 436–451.
- Behmer ST. 2009. Insect herbivore nutrient regulation. *Annual Review of Entomology* 54, 165–87.
- van den Berg RA, Hoefsloot HCJ, Westerhuis JA, Smilde AK, van der Werf MJ. 2006. Centering, scaling, and transformations: improving the biological information content of metabolomics data. *BMC genomics* 7, 142.
- Butler J, Garratt MPD, Leather SR. 2012. Fertilisers and insect herbivores: A meta-analysis. *Annals of Applied Biology* 161, 223–233.
- Camañes G, Pastor V, Cerezo M, Garcia-Andrade J, Vicedo B, Garcia-Agustin P, Flors V. 2012. A Deletion in NRT2.1 Attenuates Pseudomonas syringae-Induced Hormonal Perturbation, Resulting in Primed Plant Defenses. *Plant Physiology* 158, 1054–1066.
- Chen Y, Olson DM, Ruberson JR. 2010. Effects of nitrogen fertilization on tritrophic interactions. *Arthropod-Plant Interactions* 4, 81–94.
- Coll A, Nadal A, Collado R, Capellades G, Kubista M, Messeguer J, Pla M. 2010. Natural variation explains most transcriptomic changes among maize plants of MON810 and comparable non-GM varieties subjected to two N-fertilization farming practices. *Plant Molecular Biology* 73, 349–362.

- Cruz D, Eizaguirre M. 2015. Do *Sesamia nonagrioides* (Lepidoptera; Noctuidae) Gravid Females Discriminate Between Bt or Multivitamin Corn Varieties? Role of Olfactory and Visual Cues. *Journal of Insect Science* 15, 33–33.
- Decourcelle M, Perez-Fons L, Baulande S, et al. 2015. Combined transcript, proteome, and metabolite analysis of transgenic maize seeds engineered for enhanced carotenoid synthesis reveals pleiotropic effects in core metabolism. *Journal of Experimental Botany* 66, 3141–3150.
- Degen T, Dillmann C, Marion-Poll F, Turlings TCJ. 2004. High Genetic Variability of Herbivore-Induced Volatile Emission within a Broad Range of Maize Inbred Lines. *Plant Physiology* 135, 1928–1938.
- Faria CA, Wäckers FL, Pritchard J, Barrett D a, Turlings TCJ. 2007. High susceptibility of Bt maize to aphids enhances the performance of parasitoids of lepidopteran pests. *PloS one* 2, e600.
- Hermans C, Hammond JP, White PJ, Verbruggen N. 2006. How do plants respond to nutrient shortage by biomass allocation? *Trends in Plant Science* 11, 610–617.
- Hogenhout SA, Bos JIB. 2011. Effector proteins that modulate plant-insect interactions. *Current Opinion in Plant Biology* 14, 422–428.
- Joern A, Behmer ST. 1998. Impact of diet quality on demographic attributes in adult grasshoppers and the nitrogen limitation hypothesis. *Ecological Entomology* 23, 174–184.
- Kaever A, Landesfeind M, Feussner K, Mosblech A, Heilmann I, Morgenstern B, Feussner I, Meinicke P. 2014. MarVis-Pathway: integrative and exploratory pathway analysis of non-targeted metabolomics data. *Metabolomics*, 764–777.
- Kallenbach M, Bonaventure G, Gilardoni P a, Wissgott A, Baldwin IT. 2011. Empoasca leafhoppers attack wild tobacco plants in a jasmonate-dependent manner and identify jasmonate mutants in natural populations. *Proceedings of the National Academy of Sciences of the United States of America* 109, E1548-57.
- Kant MR, Ament K, Sabelis MW, Haring M a, Schuurink RC. 2004. Differential timing of spider mite-induced direct and indirect defenses in tomato plants. *Plant Physiology* 135, 483–495.
- Kant MR, Jonckheere W, Knecht B, et al. 2015. Mechanisms and ecological consequences of plant defence induction and suppression in herbivore communities. *Annals of Botany* 115, 1015–1051.
- Kawazu K, Mochizuki A, Sato Y, Sugeno W, Murata M, Seo S, Mitsuhashi I. 2012. Different expression profiles of jasmonic acid and salicylic acid inducible genes in the tomato plant against herbivores with various feeding modes. *Arthropod-Plant Interactions* 6, 221–230.
- Koricheva J, Larsson S, Haukioja E, Keinänen M. 1998. Regulation of woody plant secondary metabolism by resource availability: hypothesis testing by means of meta-analysis. *Oikos* 83, 212–226.
- Kusano M, Fukushima A, Redestig H, Saito K. 2011. Metabolomic approaches toward understanding nitrogen metabolism in plants. *Journal of Experimental Botany* 62, 1439–1453.

- Lou Y, Baldwin IT. 2004. Nitrogen Supply Influences Herbivore-Induced Direct and Indirect Defenses and Transcriptional Responses in *Nicotiana attenuata*. *Plant Physiology* 135, 496–506.
- Lumbierres B, Albajes R, Pons X. 2004. Transgenic Bt maize and *Rhopalosiphum padi* (Homoptera, Aphididae) performance. *Ecological Entomology* 29, 309–317.
- Lumbierres B, Starý P, Pons X. 2010. Effect of Bt maize on the plant-aphid-parasitoid tritrophic relationships. *BioControl* 56, 133–143.
- Mithöfer A, Boland W. 2012. Plant defense against herbivores: Chemical aspects. *Annual Review of Plant Biology* 63, 431–450.
- Mugford S, Barclay E, Drurey C, Findley K, Hogenhout S. 2016. An immuno-suppressive aphid saliva protein is delivered into the cytosol of plant mesophyll cells during feeding. *bioRxiv* X.
- Musser RO, Hum-Musser SM, Eichenseer H, Peiffer M, Ervin G, Murphy JB, Felton GW. 2002. Herbivory: caterpillar saliva beats plant defences. *Nature* 416, 599–600.
- Naqvi S, Zhu C, Farre G, Ramessar K, Bassie L, Perez D, Ros G, Sandmann G, Capell T, Christou P. 2009. Transgenic multivitamin corn through biofortification of endosperm with three vitamins representing three. *PNAS* 106, 7762–7767.
- Niemeyer H. 2009. Hydroxamic Acids Derived from 2-Hydroxy-2 H-1, 4-Benzoxazin-3 (4 H)-one: Key Defense Chemicals of Cereals. *Journal of Agricultural and Food Chemistry* 57, 1677–1696.
- Obrist LB, Dutton A, Albajes R, Bigler F. 2006. Exposure of arthropod predators to Cry1Ab toxin in Bt maize fields. *Ecological Entomology* 31, 143–154.
- Ode PJ. 2006. Plant chemistry and natural enemy fitness: effects on herbivore and natural enemy interactions. *Annual Review Entomology* 51, 163–185.
- Oksanen J, Blanchet FG, Friendly M, et al. 2013. Package ‘vegan’ | Community Ecology Package. R package.
- Pons X, Lumbierres B, López C, Albajes R. 2005. Abundance of non-target pests in transgenic Bt-maize: A farm scale study. *European Journal of Entomology* 102, 73–79.
- Prestidge RA. 1982. Instar duration, adult consumption, oviposition and nitrogen utilization efficiencies of leafhoppers feeding on different quality food (Auchenorrhyncha: Homoptera). *Ecological Entomology* 7, 91–101.
- Van Der Putten WH, Vet LEM, Harvey JA, Wäckers FL. 2001. Linking above- and belowground multitrophic interactions of plants, herbivores, pathogens, and their antagonists. *Trends in Ecology and Evolution* 16, 547–554.
- Rauschen S, Schultheis E, Hunfeld H, Schaarschmidt F, Schuphan I, Eber S. 2011. Diabrotica-resistant Bt-maize DKc5143 event MON88017 has no impact on the field densities of the leafhopper *Zyginidia scutellaris*. *Environmental Biosafety Research* 9, 87–99.

- Richter A, Schaff C, Zhang Z, et al. 2016. Characterization of the herbivore-induced biosynthetic pathways of the volatile homoterpenes 3,8-dimethyl-1,4,7-nonatriene (DMNT) and 4,8,12-trimethyltrideca-1,3,7,11-tetraene, in *Zea mays*. Plant Cell accept wit.
- Ricroch E, Berge JB, Kuntz M, Ricroch AE, Bergé JB, Kuntz M. 2011. Evaluation of genetically engineered crops using transcriptomic, proteomic, and metabolomic profiling techniques. Plant Physiology 155, 1752–1761.
- Sarmiento RA, Lemos F, Bleeker PM, Schuurink RC, Pallini A, Oliveira MGA, Lima ER, Kant M, Sabelis MW, Janssen A. 2011. A herbivore that manipulates plant defence. Ecology Letters 14, 229–236.
- Saxena D, Totzky GS. 2001. Corn has a higher lignin content than non-Bt corn. American Journal of Botany 88, 1704–1706.
- Scheible W-R, Morcuende R, Czechowski T, Fritz C, Osuna D, Palacios-Rojas N, Schindelasch D, Thimm O, Udvardi MK, Stitt M. 2004. Genome-wide reprogramming of primary and secondary metabolism, protein synthesis, cellular growth processes, and the regulatory infrastructure of *Arabidopsis* in response to nitrogen. Plant Physiology 136, 2483–2499.
- Schmelz EA, Alborn HT, Engelberth J, Tumlinson JH. 2003. Nitrogen deficiency increases volicitin-induced volatile emission, jasmonic acid accumulation, and ethylene sensitivity in maize. Plant Physiology 133, 295–306.
- Smith CA, Want EJ, O’Maille G, Abagyan R, Siuzdak G, CA Smith, J Elizabeth, G O’Maille, Ruben Abagyan, and Gray S. 2006. XCMS: processing mass spectrometry data for metabolite profiling using Nonlinear Peak Alignment, Matching, and Identification. Analytical Chemistry 78, 779–87.
- Stam JM, Kroes A, Li Y, Gols R, van Loon JJAA, Poelman EH, Dicke M. 2014. Plant interactions with multiple insect herbivores: from community to genes. Annual Review of Plant Biology 65, 689–713.
- Stout MJ, Brovont RA, Duffey SS. 1998. Effect of nitrogen availability on expression of constitutive and inducible chemical defenses in tomato, *Lycopersicon esculentum*. Journal of Chemical Ecology 24, 945–963.
- Thaler JS. 2002. Effect of jasmonate-induced plant responses on the natural enemies of herbivores. Journal of Animal Ecology 71, 141–150.
- Thaler JS, Stout MJ, Karban R, Duffey SS. 2001. Jasmonate-mediated induced plant resistance affects a community of herbivores. Ecological Entomology 26, 312–324.
- Turlings TCJ, Davison AC, Tamò C. 2004. A six-arm olfactometer permitting simultaneous observation of insect attraction and odour trapping. Physiological Entomology 29, 45–55.
- Turlings TCJ, Jeanbourquin PM, Held M, Degen T. 2005. Evaluating the induced-odour emission of a Bt maize and its attractiveness to parasitic wasps. Transgenic Research 14, 807–16.
- Turlings TCJ, Lengwiler UB, Bernasconi ML, Wechsler D. 1998. Timing of induced volatile emissions in maize seedlings. Planta 207, 146–152.



Villarroel CA, Jonckheere W, Alba JM, Glas JJ, Dermauw W, Haring MA, Van Leeuwen T, Schuurink RC, Kant MR. 2016. Salivary proteins of spider mites suppress defenses in *Nicotiana benthamiana* and promote mite reproduction. *Plant Journal* 86, 119–131.

Virla EG, Casuso M, Frias E A. 2010. A preliminary study on the effects of a transgenic corn event on the non-target pest *Dalbulus maidis* (Hemiptera: Cicadellidae). *Crop Protection* 29, 635–638.

De Vos M, Van Oosten VR, Van Poecke RMP, et al. 2005. Signal Signature and Transcriptome changes of *Arabidopsis* during pathogen and insect attack. *Molecular Plant-Microbe Interactions* 18, 923–937.

Walling L. 2000. The Myriad Plant Responses to Herbivores. *Journal of Plant Growth Regulation* 19, 195–216.

Winter TR, Rostás M. 2010. Nitrogen deficiency affects bottom-up cascade without disrupting indirect plant defense. *Journal of Chemical Ecology* 36, 642–651.

Wolt JD, Keese P, Raybould A, Fitzpatrick JW, Burachik M, Gray A, Olin SS, Schiemann J, Sears M, Wu F. 2010. Problem formulation in the environmental risk assessment for genetically modified plants. *Transgenic Research* 19, 425–36.

Zanga D, Capell T, Slafer GA, Christou P, Savin R. 2016. A carotenogenic mini-pathway introduced into white corn does not affect development or agronomic performance. *Scientific Reports* 6, 38288.

Zhang L, Zhang F, Melotto M, Yao J, He SY. 2017. Jasmonate signaling and manipulation by pathogens and insects. *Journal of Experimental Botany*, erw478.

Zytyńska SE, Preziosi RF. 2011. Genetic interactions influence host preference and performance in a plant-insect system. *Evolutionary Ecology* 25, 1321–1333.

1 Table 1. Effects of maize genotype, nitrogen treatment, their interaction and maize's developmental stage on field abundances of herbivores and natural enemies. Arthropod  
 2 abundance was determined by visual sampling on five maize developmental stages. Significant effects ( $\alpha=0.05$ ) appear in bold.

3

| <b>Herbivores</b>   |    |                    |                  |                     |                  |               |                  |                    |                  |               |                  |
|---------------------|----|--------------------|------------------|---------------------|------------------|---------------|------------------|--------------------|------------------|---------------|------------------|
| <i>Factors</i>      | df | <b>Leafhoppers</b> |                  | <b>Planthoppers</b> |                  | <b>Thrips</b> |                  | <b>Lepidoptera</b> |                  | <b>Aphids</b> |                  |
|                     |    | $\chi^2$           | p                | $\chi^2$            | p                | $\chi^2$      | p                | $\chi^2$           | p                | $\chi^2$      | p                |
| genotype            | 1  | 4.09               | <b>0.046</b>     | 0.09                | 0.779            | 1.41          | 0.233            | 2.19               | 0.076            | 0.64          | 0.423            |
| nitrogen            | 1  | 5.28               | <b>0.023</b>     | 11.9                | <b>&lt;0.002</b> | 0.15          | 0.693            | 0.18               | 0.613            | 10.91         | <b>0.001</b>     |
| genotype × nitrogen | 1  | 2.1                | 0.150            | 0.43                | 0.547            | 0.45          | 0.501            | 1.38               | 0.161            | 2.57          | 0.109            |
| develop. stage      | 4  | 223.14             | <b>&lt;0.001</b> | 32.98               | <b>&lt;0.001</b> | 157.96        | <b>&lt;0.001</b> | 181.53             | <b>&lt;0.001</b> | 45.65         | <b>&lt;0.001</b> |

  

| <b>Natural enemies</b> |    |                     |                  |                    |                  |               |                  |                      |                  |                |                  |                  |              |
|------------------------|----|---------------------|------------------|--------------------|------------------|---------------|------------------|----------------------|------------------|----------------|------------------|------------------|--------------|
| <i>Factors</i>         | df | <b>Anthocoridae</b> |                  | <b>Chrysopidae</b> |                  | <b>Thrips</b> |                  | <b>Coccinellidae</b> |                  | <b>Miridae</b> |                  | <b>Arachnida</b> |              |
|                        |    | $\chi^2$            | p                | $\chi^2$           | p                | $\chi^2$      | p                | $\chi^2$             | p                | $\chi^2$       | p                | $\chi^2$         | p            |
| genotype               | 1  | 0.012               | 0.914            | 0.29               | 0.564            | 0.161         | 0.686            | 0.05                 | 0.83             | 1.17           | 0.286            | 1.14             | 0.306        |
| nitrogen               | 1  | 0.49                | 0.49             | 0.29               | 0.564            | 0.875         | 0.346            | 0.21                 | 0.67             | 0.16           | 0.69             | 1.14             | 0.306        |
| genotype × nitrogen    | 1  | 1.95                | 0.168            | 0.02               | 0.881            | 0.24          | 0.619            | 0.15                 | 0.72             | 1.90           | 0.175            | 0.00             | 0.992        |
| develop. stage         | 4  | 52.41               | <b>&lt;0.001</b> | 16.45              | <b>&lt;0.001</b> | 45.08         | <b>&lt;0.001</b> | 22.68                | <b>&lt;0.001</b> | 57.08          | <b>&lt;0.001</b> | 16.93            | <b>0.004</b> |

4 Fig 1. Choice of maize volatiles by leafhopper *Z. scutellaris* on the olfactometer. Tested plants consisted  
5 of Wild type and Carolight<sup>R</sup> plants grown under control or surplus nitrogen (+N) conditions. Different  
6 letters indicate differences between treatments ( $\alpha=0.05$ ).

7

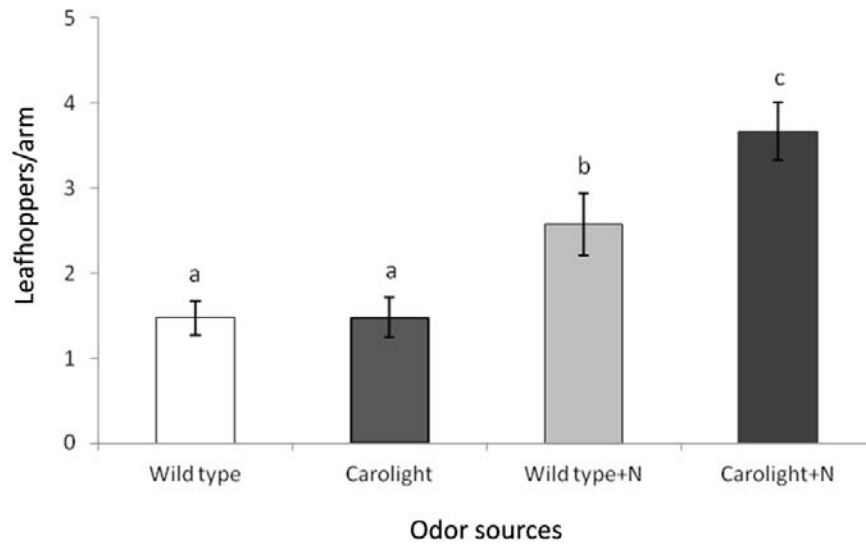

8

9

10 Table 2. Volatile emissions (ng/h) from control and herbivore-induced maize plants (Carolight<sup>R</sup>, Wild type) at two different N availability treatments (control, +N) (n=7).  
 11 Amounts of each compound were compared among treatments using a non-parametric Kruskal-Wallis test followed by Dunn's test (\*p<0.05, \*\*p<0.01, \*\*\*p<0.001).  
 12 Compounds denoted with "N" were only tentatively identified by comparison of their MS to that reported in libraries.

13

|                                         | Wild type |      | Carolight |      | Wild type+N |      | Carolight+N |      | $\chi^2$ | P                |
|-----------------------------------------|-----------|------|-----------|------|-------------|------|-------------|------|----------|------------------|
|                                         | mean      | ±SE  | mean      | ±SE  | mean        | ±SE  | mean        | ±SE  |          |                  |
| <i>Control</i>                          |           |      |           |      |             |      |             |      |          |                  |
| <b>α-copaene</b>                        | 0.59      | 0.13 | 0.67      | 0.17 | 0.51        | 0.09 | 1.21        | 0.22 | 6.11     | 0.11             |
| <b>E-β-caryophyllene</b>                | 0.44      | 0.06 | 0.35      | 0.06 | 0.32        | 0.05 | 0.78        | 0.15 | 6.31     | 0.10             |
| <b>β-sesquiphellandrene<sup>N</sup></b> | 1.36      | 0.26 | 1.16      | 0.34 | 1.01        | 0.19 | 2.96        | 0.69 | 5.53     | 0.14             |
| <i>Induced</i>                          |           |      |           |      |             |      |             |      |          |                  |
| <b>DMNT</b>                             | 3.74      | 0.79 | 3.44      | 0.80 | 3.51        | 1.46 | 4.27        | 0.94 | 0.98     | 0.80             |
| <b>Indole</b>                           | 7.79      | 2.55 | 5.29      | 1.40 | 7.64        | 4.00 | 6.85        | 1.68 | 1.13     | 0.77             |
| <b>α-copaene</b>                        | 0.75ab    | 0.16 | 0.60a     | 0.11 | 1.19bc      | 0.25 | 1.35c       | 0.12 | 9.10     | <b>0.03</b>      |
| <b>E-β-caryophyllene</b>                | 0.45a     | 0.08 | 0.40a     | 0.07 | 0.79b       | 0.18 | 0.92b       | 0.13 | 9.00     | <b>0.03</b>      |
| <b>(E)-β-bergamotene</b>                | 1.33      | 0.34 | 1.01      | 0.20 | 1.54        | 0.49 | 1.37        | 0.22 | 1.97     | 0.58             |
| <b>E-β-farnesene</b>                    | 4.97      | 1.45 | 2.81      | 0.85 | 5.37        | 1.90 | 4.32        | 1.03 | 1.48     | 0.69             |
| <b>β-sesquiphellandrene<sup>N</sup></b> | 2.08b     | 0.44 | 1.57ab    | 0.32 | 0.80a       | 0.14 | 3.68c       | 0.45 | 13.90    | <b>&lt;0.001</b> |

14

15

16 Fig 3. Hormonal content (ng/g dry weight) in Carolight<sup>R</sup> and Wild type plants grown under two different  
 17 nitrogen regimes (control and +N) upon *Z. scutellaris* feeding. Control and herbivore-damaged plants  
 18 (+H) were collected at different time points (24h, 48h and 96h after herbivore feeding), and  
 19 phytohormone levels were determined in freeze-dried material by UPLC-MS. The experiment was  
 20 replicated 3 times with similar results. Full factorial models combining data of the three experiments are  
 21 available in Supplementary material Table S.1. The results shown are mean ( $\pm$ SE) hormone levels of one  
 22 experiment. Asterisks indicate differences among treatments (non-parametric Kruskal-Wallis test).

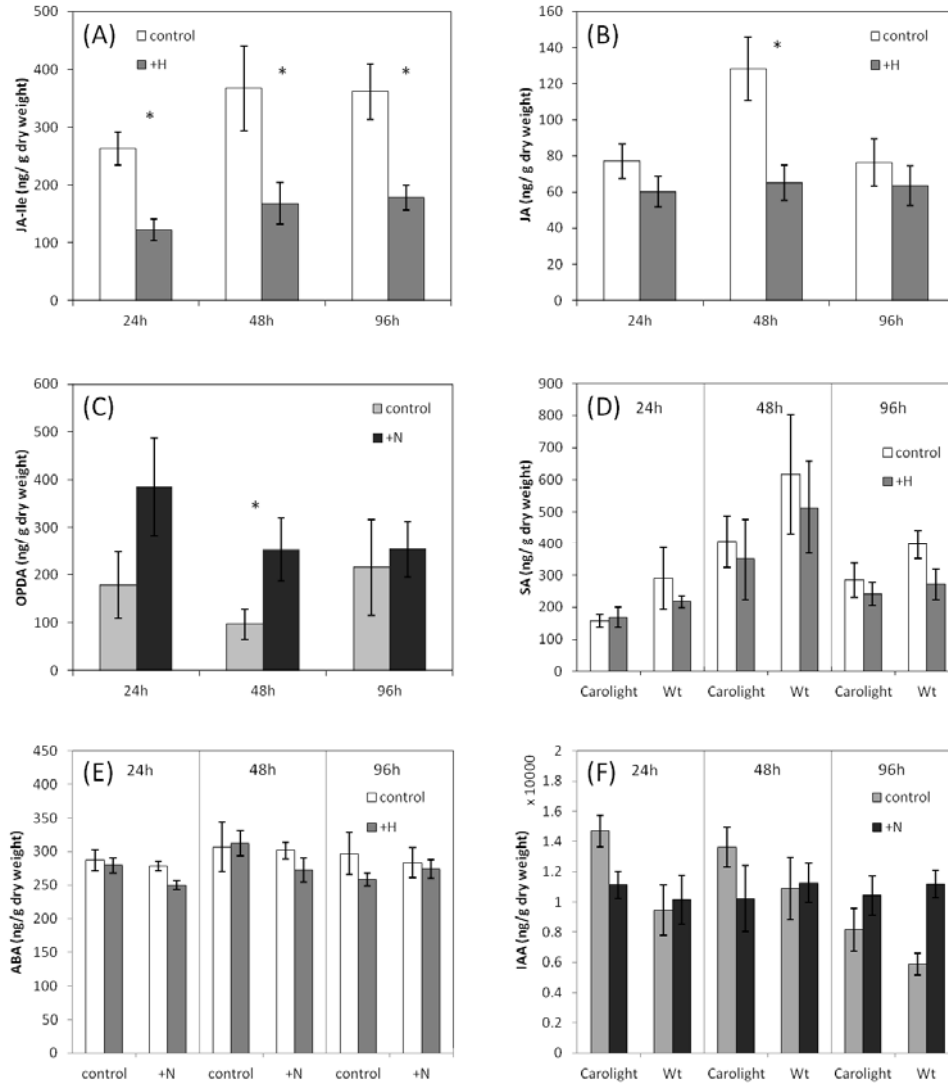

23

24

25 Fig 4. Caffeic acid (A) and chlorogenic acid (B) content (ng/g dry weight) of Carolight<sup>R</sup> and Wild type  
26 plants grown under two different nitrogen regimes (control and +N). Plants were collected at different  
27 time-points (24h, 48h and 96h after the start of the experiment), and caffeic and chlorogenic acid levels  
28 were determined in freeze-dried material by UPLC-MS. The experiment was replicated 3 times with  
29 similar results. Full factorial models combining data of the three experiments are available in  
30 Supplementary material Table S.1. The results shown are mean ( $\pm$ SE) hormone levels of one experiment.  
31 Asterisks indicate differences among treatments (non-parametric Kruskal-Wallis test).

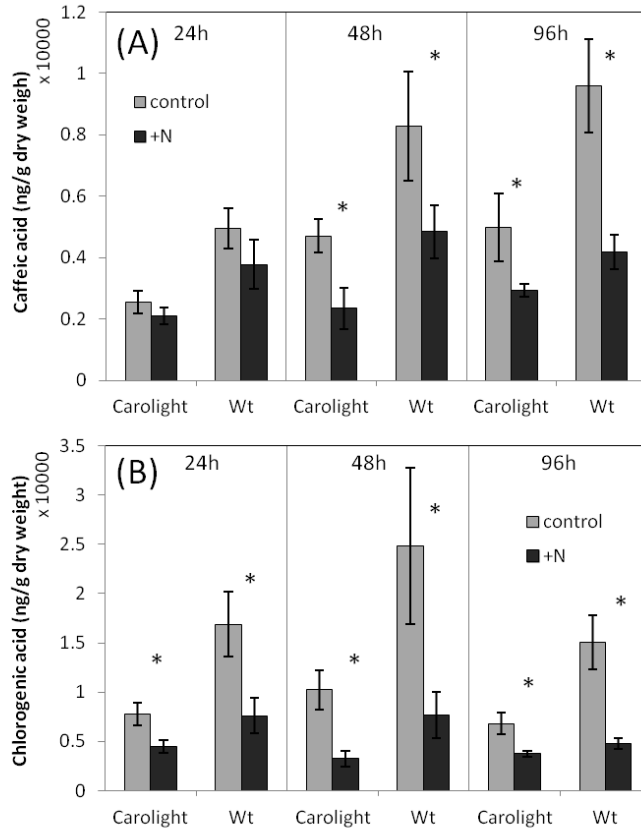

32

33

34 Fig 5. Principal component analysis (PCA) showing groups generated from signals obtained in ESI+ and  
35 ESI- by non-targeted analysis. Carolight<sup>R</sup> and Wild type (Wt) plants were grown under two different  
36 nitrogen regimes (control and +N) upon *Z. scutellaris* feeding (control and +H).

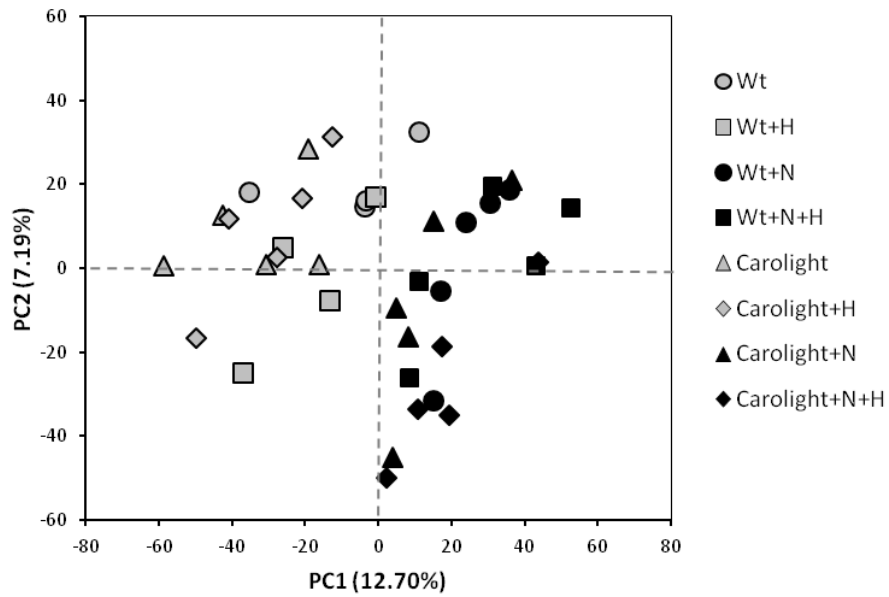

37

38

39

40

41 Table 3. PLS-DA models of the factors nitrogen, genotype and herbivory. For each factor, the number of  
 42 ions with a VIP>2 for the best model and the number of MarVis Pathway IDs are specified.

| Factor    | Components | R <sup>2</sup> | Q <sup>2</sup> | CV-ANOVA                      | VIP>2                          | MarVis ID  |           |
|-----------|------------|----------------|----------------|-------------------------------|--------------------------------|------------|-----------|
| Nitrogen  | <b>1</b>   | <b>0.875</b>   | <b>0.744</b>   | <b>F<sub>2,35</sub>=50.89</b> | <b>p=4.38x10<sup>-11</sup></b> | <b>405</b> | <b>48</b> |
|           | 1+1        | 0.968          | 0.999          | F <sub>4,33</sub> =34.80      | p=2.08x10 <sup>-11</sup>       |            |           |
| Genotype  | <b>1+1</b> | <b>0.956</b>   | <b>0.581</b>   | <b>F<sub>4,33</sub>=7.87</b>  | <b>p=0.00014</b>               | <b>69</b>  | <b>19</b> |
|           | 1+1+1      | 0.993          | 0.803          | F <sub>6,31</sub> =6.25       | p=0.00022                      |            |           |
| Herbivory | <b>1+1</b> | <b>0.967</b>   | <b>0.486</b>   | <b>F<sub>4,33</sub>=3.97</b>  | <b>p=0.0097</b>                | <b>163</b> | <b>15</b> |
|           | 1+1+1      | 0.99           | 0.634          | F <sub>6,31</sub> =2.79       | p=0.027                        |            |           |

43

44



Table 4. Metabolites with higher loadings on the best PLS-DA models (VIP>2) for the factors Nitrogen, Genotype and Herbivory that could be tentatively identified. Metabolites in A were identified by comparison of the MS/MS to online databases, while metabolites in B were assigned after comparing the accurate mass to reference compound databases. Mean abundances of the metabolites can be found in Supplementary material Fig. S.6, S.7 and S.8. Pathways were assigned using the pathway tool from MarVis 2.0 (Kaeffer et al., 2014).

| <b>A. Identified</b>              | <b>Mass neutral</b> | <b>ESI</b> | <b>RT (min)</b> | <b>Factor</b>                    | <b>Pathway</b>                                                  |
|-----------------------------------|---------------------|------------|-----------------|----------------------------------|-----------------------------------------------------------------|
| <b>Kynurenic acid</b>             | 189.0431            | +          | 0.99            | Herbivory (H↑)                   | Tryptophan-kynurenine pathway                                   |
| <b>11-trans-LTD4</b>              | 496.2592            | -          | 3.43            | Herbivory (H↑)                   | Leukotriene- Arachidonic acid metabolism                        |
| <b>19-HETE/ 20-HETE</b>           | 320.236             | +          | 2.06            | Genotype (Wt↑)                   | Arachidonic acid metabolism                                     |
| <b>Thiamine</b>                   | 265.1153            | +          | 0.86            | Genotype (Wt↑)                   | Vitamin and cofactor - Thiamine metabolism (primary metabolism) |
| <b>Phytosphingosine</b>           | 317.2932            | +          | 4.41            | Genotype (Wt↑)                   | Sphingolipid metabolism (primary metabolism)                    |
| <b>L-Tryptophan</b>               | 204.0897            | -          | 0.93            | Nitrogen (+N↑)                   | Tryptophan pathway (primary metabolism)                         |
| <b>DIMBOA-Glu</b>                 | 373.1009            | -          | 1.46            | Nitrogen (+N↑)                   | Benzoxazinoid biosynthesis                                      |
| <b>B. Assigned to</b>             | <b>Mass neutral</b> | <b>ESI</b> | <b>RT (min)</b> | <b>Factor</b>                    | <b>Pathway</b>                                                  |
| <b>Sinapoyl malate</b>            | 340.0791            | -          | 2.73            | Herbivory (H↓)                   | Biosynthesis of phenylpropanoids                                |
| <b>Porphobilinogen</b>            | 226.0965            | -          | 0.76            | Herbivory (H↑)                   | Porphyrin and chlorophyll metabolism                            |
| <b>(-)-Jasmonoyl-L-isoleucine</b> | 323.2097            | +          | 4.97            | Herbivory (H↓)                   | Biosynthesis of plant hormones                                  |
| <b>A-tocopherol</b>               | 430.3777            | +          | 5.92            | Herbivory (H↑)                   | Biosynthesis of plant secondary metabolites                     |
| <b>2,3-Dihydroxybenzoate</b>      | 154.0263            | -          | 1.44            | Herbivory (H↑)                   | Biosynthesis of phenylpropanoids                                |
| <b>Coniferol</b>                  | 180.0788            | +          | 0.84            | Genotype (Wt↑)                   | Biosynthesis of phenylpropanoids                                |
| <b>Cis-hinokiresinol</b>          | 252.1195            | -          | 0.84            | Genotype (Wt↑)                   | Biosynthesis of phenylpropanoids                                |
| <b>Unknown flavonoid</b>          | 306.0775            | -          | 1.36            | Genotype (Wt↓)                   | Flavonoid biosynthesis                                          |
| <b>Unknown flavonoid</b>          | 578.1634            | +          | 1.78            | Genotype (Wt↓)<br>Nitrogen (+N↓) | Flavone and flavonol biosynthesis                               |
| <b>Unknown flavonoid</b>          | 610.1544            | +          | 1.79            | Genotype (Wt↓)<br>Nitrogen (+N↓) | Flavone and flavonol biosynthesis                               |
| <b>Unknown flavonoid</b>          | 448.1016            | +/-        | 1.59/2.05       | Nitrogen (+N↓)                   | Flavone and flavonol biosynthesis                               |
| <b>Unknown flavonoid</b>          | 594.1579            | -          | 1.61            | Nitrogen (+N↓)                   | Flavone and flavonol biosynthesis                               |
| <b>Unknown flavonoid</b>          | 286.0483            | +          | 1.99            | Nitrogen (+N↓)                   | Flavone and flavonol biosynthesis                               |
| <b>Unknown flavonoid</b>          | 464.0949            | -          | 1.86            | Nitrogen (+N↓)                   | Flavone and flavonol biosynthesis                               |
| <b>Unknown flavonoid</b>          | 592.1802            | +          | 2.73            | Nitrogen (+N↓)                   | Flavone and flavonol biosynthesis                               |
| <b>Zeatin/Pantothenate</b>        | 219.1113            | +          | 0.8             | Nitrogen (+N↓)                   | Biosynthesis of plant hormones                                  |
| <b>HBOA</b>                       | 149.0471            | -          | 0.73            | Nitrogen (+N↑)                   | Benzoxazinoid biosynthesis                                      |
| <b>DHBOA/ DIBOA-Glc</b>           | 343.0891            | -          | 1.27            | Nitrogen (+N↑)                   | Benzoxazinoid biosynthesis                                      |
| <b>Dhurrin</b>                    | 311.1002            | -          | 0.73            | Nitrogen (+N↑)                   | Cyanoamino acid metabolism                                      |
